1           **Atypical gut microbial ecosystem from athletes with very high exercise**  
2           **capacity improves insulin sensitivity and muscle glycogen store in mice**

3   **Authors**

4   David Martin<sup>1,2</sup>, Mathis Bonneau<sup>1</sup>, Luz Orfila<sup>1</sup>, Mathieu Horeau<sup>1</sup>, Mathilde Hazon<sup>3</sup>, Romain Demay<sup>1</sup>,  
5   Emmanuelle Lecommandeur<sup>4</sup>, Rufin Boumpoutou<sup>1,5</sup>, Arthur Guillotel<sup>1,6</sup>, Pierrick Guillemot<sup>7</sup>, Mickael  
6   Croyal<sup>8,9</sup>, Pierre Cressard<sup>3</sup>, Chrystèle Cressard<sup>3</sup>, Anne Cuzol<sup>10</sup>, Valérie Monbet<sup>2#</sup> and Frédéric Derbré<sup>1#</sup>.

7   **Affiliations**

8   <sup>1</sup> Univ Rennes, M2S - UR 1274, F-35000 Rennes, France

9   <sup>2</sup> Univ Rennes, CNRS, IRMAR - UMR 6625, F-35000 Rennes, France

10   <sup>3</sup> Nahibu, Rennes, France

11   <sup>4</sup> ELS Consulting, Rennes, France

12   <sup>5</sup> Rennes Ortho Sport, Polyclinique Saint Laurent, Rennes, France

13   <sup>6</sup> Stade Rennais Football Club, Rennes, France

14   <sup>7</sup> CHU Pontchaillou, Rennes, France

15   <sup>8</sup> Institut du thorax, Nantes Université, CNRS, INSERM, Nantes, France

16   <sup>9</sup> UMS 016, UMS 3556, Nantes Université, Inserm, CNRS, Nantes, France

17   <sup>10</sup> IUT Vannes, University of South Brittany, Vannes, France

18   #: The last co-authors equally contributed to this work

19   **Co-corresponding authors:**

20   Frederic Derbré, PhD, Assistant professor

21   Laboratory “Movement, Sport and Health Sciences” – EA7470

22   University of Rennes 2 / ENS Rennes, 35170 Bruz, France

23   Mail : [Frederic.derbre@univ-rennes2.fr](mailto:Frederic.derbre@univ-rennes2.fr)

24

25   Valerie Monbet, PhD, Full professor

26   IRMAR - UMR CNRS 6625

27   University of Rennes, 35000 Rennes, France

28   Mail : [valerie.monbet@univ-rennes.fr](mailto:valerie.monbet@univ-rennes.fr)

**NOTE: This preprint reports new research that has not been certified by peer review and should not be used to guide clinical practice.**

## 29 **Abstract**

30 **Background.** The gut bacterial ecosystem plays a key role in the host's energy metabolism, and  
31 potentially in the host's exercise capacity, recognized as a powerful predictor of health status and risk  
32 of mortality.

33 **Objective.** To deepen our understanding of the gut bacterial ecosystem relationship with host's  
34 exercise capacity and energy metabolism, we characterized the gut microbiota in a cohort of healthy  
35 humans with heterogeneous exercise capacities, and next determined the impact of fecal microbiota  
36 transplantation (FMT) from donors of this cohort on energy metabolism and exercise capacity of  
37 recipient mice.

38 **Design.** 50 male normo-weight participants (from inactive to elite endurance athletes) performed food  
39 frequency questionnaire (FFQ) and exercise tests to determine exercise capacity parameters ( $VO_{2max}$ ,  
40 fat oxidation, exercise energy expenditure). Metagenomic shotgun and metabolomic analyses were  
41 performed to characterize gut microbiota ecosystem and short-chain fatty acids (SCFAs) on human and  
42 mice fecal samples. Mice performed running exercise capacity tests and metabolic parameters were  
43 determined in skeletal muscle and plasma samples.

44 **Results.** While our data support that the bacterial ecosystem appears to be modestly altered between  
45 individuals with low to high exercise capacities, we report that gut bacterial  $\alpha$ -diversity, density, and  
46 functional richness are significantly reduced in athletes with very high exercise capacity. By using FMT,  
47 we report that the engraftment of these atypical gut microbiota improves insulin sensitivity and muscle  
48 glycogen stores into transfected mice.

49 **Conclusion.** Our data highlight promising therapeutic perspectives in fecal transplantation from human  
50 donors selected based on exercise capacity parameters.

51 **KEYWORDS:** enterotype, propionate, training, nutrients, *Prevotella*

52 **What is already known on this topic:**

- 53 - Gut microbiota ecosystem directly affects exercise capacity and muscle energy metabolism.  
54 - Athletes with high exercise capacity exhibit greater gut microbiota diversity and an over-  
55 representation of some bacterial species compared to inactive individuals, but current available  
56 data present major bias including the lack of consideration of dietary habits and body composition.

57 **What this study adds:**

- 58 - Exercise capacity is associated with atypical gut microbiota communities, independently of food  
59 habits and body composition.  
60 - Atypical gut microbial ecosystem from athletes with very high exercise capacity are related to high  
61 fecal propionate content, but negatively associated with gut microbiota  $\alpha$ -diversity, bacterial  
62 density and gut microbiota functional abundance.  
63 - Depending on the donor's exercise capacity, gut bacterial ecosystems affect insulin sensitivity, but  
64 not exercise capacity, of transfected mice.

65 **How this study might affect research, practice or policy:**

- 66 - These data open promising research perspectives: 1) to improve the management of the gut  
67 microbiota ecosystem of elite athletes and patients performing adapted physical activity for  
68 therapeutic purposes, and 2) to personalize FMT in patients treated for non-communicable  
69 diseases by including exercise capacity parameters in the clinical criteria for donor selection.

70

## 71 INTRODUCTION

72 Exercise capacity is now considered as a powerful predictor of health status and risk of mortality [1,2].  
73 It refers to the maximum amount of physical exertion that an individual can sustain over a prolonged  
74 period of time [3]. Exercise capacity can be assessed during exercise testing by measuring maximal  
75 oxygen consumption ( $\dot{V}O_{2max}$ ) and fat oxidation (FO) through indirect calorimetry.  $\dot{V}O_{2max}$  characterizes  
76 the maximum energy that an organism is able to produce during incremental exercise, while the  
77 percentage of FO during fasted submaximal exercise provides insight into the whole-body metabolic  
78 profile [4,5]. Specifically, during light to moderate submaximal exercise, a healthy organism  
79 preferentially degrades fatty acids for its energy supply, derived from both adipose tissue and  
80 intramuscular triglyceride breakdown [6]. When the intensity is high to maximal, the organism  
81 switches to preferentially use carbohydrates (CHO) provided by muscle glycogen and blood glucose  
82 derived from both liver glycogenolysis and gluconeogenesis [6]. However, unlike the almost unlimited  
83 fatty acid stores, muscle glycogen stores are limited, and their depletion leads to a reduction in exercise  
84 intensity or duration [7]. Increasing the proportion of energy substrates other than CHO during  
85 exercise, particularly fatty acids, is thus an essential strategy to spare muscle glycogen improving  
86 exercise capacity [8].

87 The gut bacterial ecosystem plays a key role in the host's energy metabolism [9–11], and potentially in  
88 the host's exercise capacity. In germ-free or antibiotics-treated (ATB) mice, the absence of gut  
89 microbiota directly reduces exercise capacity [12–14], notably due to concomitant reduction in  
90 intestinal absorption of glucose and muscle glycogen stores [13,15]. Moreover, the absence or  
91 reduction of short-chain fatty acids (SCFAs) production in an organism lacking gut microbiota or  
92 exhibiting dysbiotic gut microbiota displays the crucial role of SCFAs in these alterations [16,17]. In  
93 humans, cross-sectional studies reveal greater diversity and an over-representation of some bacterial  
94 populations in the gut microbiota of elite athletes compared to less active individuals [18–21].  
95 However, all these clinical studies show some limitations including the lack of consideration of dietary  
96 habits and body mass index which are known to modulate the gut microbiota composition and function  
97 [22].

98 Herein, we report our characterization of the relationship between exercise capacity and the gut  
99 bacterial ecosystem in humans, ranging from inactive to elite endurance athletes, independently from  
100 diet habits or body composition ([EXOMIC cohort](#)). Our data highlight that exercise capacity impacts  
101 gut bacterial ecosystem and fecal SCFA levels, independently from dietary habits. Surprisingly, we  
102 observe that humans with very high exercise capacity exhibit reduced gut microbiota diversity, density  
103 and functional pathways abundance. Using fecal microbiota transplantation (FMT) from humans of our

104 cohort to ATB-pretreated mice, we demonstrate that the gut microbiota associated to exercise  
105 capacity of donors affects insulin sensitivity and muscle glycogen store in transfected mice, highlighting  
106 the essential role of the gut microbiota associated to donor's exercise capacity in the changes of  
107 metabolic profile of the FMT recipients.

## 108 **MATERIELS AND METHODS**

### 109 **Human clinical study**

110 The EXOMIC pilot clinical study took place at the laboratory "Movement, Sport and health Sciences"  
111 (M2S, Rennes, France). The study was approved by the national Comité de protection des personnes  
112 Ouest IV Nantes (ID-RCB: 2021-A02496-35) and registered on ClinicalTrials.gov under [NCT05220657](#).

### 113 **Mouse experiments**

114 C57BL/6J male mice (8-week-old; Janvier Labs, France) were randomly divided into the following two  
115 experimental groups: control group (CTL, n = 12) versus mice transfected (n = 24) by heterogeneous  
116 human donors (n=8). Except for running tests, mice were housed in individual standard cages without  
117 wheels, and thus were not subjected to daily exercise.

### 118 **Medical inclusion visits, fecal samples collection and exercise testing**

119 Each participant completed the food frequency questionnaire to estimate daily food and nutrient  
120 intakes (FFQ) [23]. Daily energy expenditure was also calculated on a weekly basis (MET-minutes per  
121 week) using the Global Physical Activity Questionnaire (GPAQ) [24]. Percentage body fat (%FM) was  
122 measured by skinfold measurement using Harpenden® forceps based on the 4-skinfolds method. One  
123 fecal sample was collected for each participant during the 15 days following the medical inclusion and  
124 before the last visit to the laboratory. The participants performed two exercise tests on ergocycle to  
125 respectively determine (1) maximal oxygen consumption ( $\dot{V}O_{2max}$ ) and (2) carbohydrate (CHO) and fat  
126 oxidation (FO) using an indirect calorimetry system (Ultima CardiO2, Medgraphics, United Kingdom).

### 127 **Fecal Material Transfection (FMT) from humans to mice**

128 After 10 days of treatment with an oral cocktail of broad-spectrum antibiotics [13], mice selected for  
129 transfection (n=24) received 100 µg of fecal material by oral gavage every morning during 3 days, then  
130 once per week for the next two weeks. Fecal samples from FMT and CTL mice were individually  
131 collected before and after the antibiotic treatment, and 5 weeks post-FMT. Gastrocnemius muscles and  
132 abdominal fat mass were dissected, weighed and then either frozen in liquid nitrogen.

### 133 **Running exercise capacity in mice**

134 All mice performed a submaximal running test on a treadmill (Ugo Basile, Gemonio, Italy) before and  
135 after antibiotic treatment, and then each week during the next 2 weeks. Running exercise capacity was  
136 determined by the time until exhaustion from a test adapted from Okamoto et al. [14].

### 137 **Metabolic parameters**

138 Glycemia was measured using Automated Beckman Coulter (Beckman Coulter, Brea, CA). Serum insulin  
139 concentrations were measured by enzyme-linked immunosorbent assay (ELISA) according to  
140 manufacturer's instructions (Millipore, St Louis, MO, USA). The acid-hydrolysis method used for muscle  
141 glycogen quantification was adapted from the protocols described by Adamo and Graham [25].

#### 142 **Metagenomics data**

143 Fecal metagenomic shotgun sequences from both human and mice experiments underwent a pre-  
144 processing pipeline, where sequences were quality filtered using KneadData2 with default parameters  
145 [26]. MetaPhlan3 was used for quantitative profiling the taxonomic composition of the microbial  
146 communities of all metagenomic samples [26]. HUMANN3 was used to profile pathway and gene family  
147 abundances [26].

#### 148 **Metabolomic data**

149 Measurement of short-chain fatty acids (SCFAs), amino acids and bile acids (BAs) concentrations were  
150 determined in fecal samples by liquid chromatography-tandem mass spectrometry (LC-MS/MS) by the  
151 CORSAIRE platform (Biogenouest, Nantes, France).

#### 152 **Statistical analysis**

153 Data are presented as means  $\pm$  SD. Statistical analysis between groups was analyzed according to the  
154 data distribution and data type. The threshold for statistical significance was assumed to be  $p < 0.05$ .

155 Additional experimental methods and information are provided in online supplemental materials files.

## 156 **RESULTS**

### 157 **Exercise capacity is associated with atypical gut microbiota communities, independently of food and** 158 **nutrient intakes.**

159 We first examined whether exercise capacity can affect gut microbiota compositions in healthy  
160 humans. To this purpose, we recruited 50 young males to create a physiological and biological  
161 database ranging from very low to very high exercise capacity populations, including non-athletes  
162 (NoA,  $n=21$ ), elite soccer players (ESP,  $n=15$ ) and elite cyclists (EC,  $n=14$ ). To best limit the differences  
163 in food habits between experimental groups, we recruited the NoA participants by matching their food  
164 intakes collected by Short Form Food Frequency Questionnaire to correspond qualitatively to the EC's  
165 food intakes (Figure 1A, Supplemental Material). All participants recruited were normo-weight (Table  
166 S1), completed a long form of FFQ, and performed two sessions of exercise testing (Figure 1A).  
167 Participants included in this cohort presented  $\dot{V}O_{2max}$  levels ranging from 35 to 85 ml/min/kg (Figure  
168 1B), with a proportion of energy expenditure from fat oxidation during submaximal exercise, ranging  
169 from 0 to 85% (Figure 1C), characterizing a highly heterogeneous cohort in terms of energy expenditure  
170 and energy substrates used during exercise.

171 All participants provided their fecal samples to characterize the gut bacterial ecosystem using  
172 metagenomics sequencing [26]. We first observe that the two coordinates of the Principal Coordinates  
173 Analysis (PCoA) of the pairwise dissimilarity matrix of samples (i.e. Bray Curtis dissimilarity metric)  
174 account for 40% of the variability in gut microbiota composition within EXOMIC cohort (Figure 1D).  
175 Specifically, individuals with negative coordinates on PCo1 are predominantly elite cyclists and exhibit  
176 a gut microbiota composition characterized by a high relative abundance of species belonging to the  
177 *Prevotella* genus, mainly represented by the high expression of *Prevotella copri* (Figure 1D).  
178 Participants with positive coordinates on PCo 1 are mostly non-athletes and present a gut microbiota  
179 composition characterized by a high relative abundance of species belonging to the *Bacteroides* genus,  
180 associated with high expression of *Bacteroides uniformis*, *Bacteroides vulgatus* and *Feacalibacterium*  
181 *prausnitzii* (Figure 1D). These observations are consistent with previous findings [21,27,28], and  
182 support the concept that humans with high exercise capacity have an atypical gut microbiota  
183 composition compared to their counterparts with low exercise capacity.

184 On the Figures 1E and 1F, each line symbolizes variables characterizing a participant included in the  
185 EXOMIC cohort. The Hierarchical Ascendant Clustering (HAC) of gut microbiota compositions reveals  
186 two distinct clusters related to exercise capacity parameters (Figure 1E), close to the *Bacteroides* and  
187 *Prevotella* enterotypes concept [29]. The Figure 1F represents the environmental variables associated  
188 to each gut microbiota composition, ordered by the HAC. We first estimated the 95% of the confidence  
189 intervals for the  $r$  correlation coefficients between environmental variables (i.e. macronutrients,  
190 physiological variables, body composition, SCFAs and diversity indexes) and coordinates that  
191 summarize the variation of gut microbiota compositions within the EXOMIC cohort. Our results reveal  
192 that relative macronutrient intakes, including carbohydrates (CHO), fibers, proteins, and lipids, exhibit  
193 weak and non-significant association with the coordinates of the gut microbiota composition's PCoA  
194 (Figures 1G and S1B). Employing non-parametric redundancy analysis (Canonical Analysis of Principal  
195 Coordinates, CAP, Supplemental Material), we measured how strongly environmental variables (i.e.  
196 diet, exercise capacity parameters, SCFAs) are linked to the structure and composition of the bacterial  
197 ecosystem, computing the explained variance and its associated  $p$  value. CAP confirms no discernible  
198 association between food or nutrient intakes and gut microbiota compositions ( $p>0.05$ , Figures S1C-  
199 F). Conversely, exercise capacity variables are significantly linked with 12% of the gut microbiota  
200 compositions ( $p=0.01$ , Figure S1G). Notably,  $\dot{V}O_{2max}$ , EEE and FO display positive and significant  
201 associations with the first Coordinate of the gut microbiota composition's PCoA ( $p<0.05$ , Figure 1G).  
202 Together, these findings support that exercise capacity directly affects gut microbiota composition,  
203 independently of food or nutrient intakes.

204 **Atypical gut microbial ecosystem from athletes with very high exercise capacity are also related to**  
205 **high fecal propionate content.**

206 We report in our cohort a significant association of 15% between fecal SFCAs content and gut  
207 microbiota compositions ( $p=0.01$ , Figure S1H). Notably, fecal valerate and propionate content exhibit  
208 the strongest associations ( $p<0.05$ , Figure 1G) with the first Coordinate of the gut microbiota  
209 composition's PCoA, mainly driven by the *Prevotella copri* expression (Figure 1D). Species belonging to  
210 the *Prevotella* genus are generally related to a non-western diet [30,31], where starch fermentation  
211 leads to an increase in fecal SCFA content [32]. Here, we observe that the proportion of starch intakes  
212 are not associated with fecal valerate and propionate content within the EXOMIC cohort (Figure S2A),  
213 suggesting that the host's exercise capacity could impact fecal SCFA production independently of fiber  
214 intakes. Interestingly, *Phascolarctobacterium succinatutens*, well-identified to transform succinate  
215 into propionate [33], is the second main bacteria associated with the first Coordinate of the gut  
216 microbiota composition's PCoA (Figure 1D). While *Prevotella copri* appears to be a succinate producer  
217 rather than propionate producer [34], it seems consistent that fecal propionate content and those  
218 species are associated with the first Coordinate of the gut microbiota composition's PCoA. These  
219 associations between 1) high exercise capacity parameters, 2) gut microbiota composition dominated  
220 by *Prevotella copri* and *Phascolarctobacterium succinatutens* and 3) high fecal propionate content are  
221 finally consistent with previous studies supporting that propionate supplementation improves exercise  
222 capacity in mice [19], as well as resting fat oxidation and energy expenditure in fasted humans [35].

223 **High exercise capacity is negatively associated with gut microbiota  $\alpha$ -diversity, bacterial density and**  
224 **gut microbiota functional abundance.**

225 Over the last decade, clinical studies conducted in humans with low to moderate exercise capacity  
226 have shown that  $\dot{V}O_{2max}$  or training volume was positively correlated with gut microbiota  $\alpha$ -diversity  
227 [28,36,37]. Here, our data support that gut microbiota  $\alpha$ -diversity would ultimately follow an inverted-  
228 U shape relationship with  $\dot{V}O_{2max}$  (Figure 2A). For hosts with  $\dot{V}O_{2max}$  between 35 and 60 ml/min/kg, the  
229 association is positive and consistent with previous studies [36]. However, for hosts with  $\dot{V}O_{2max}$  greater  
230 than 60 ml/min/kg, the association becomes negative (Figure 2A). Fecal bacterial density is also  
231 significantly reduced in hosts with a high capacity to consume energy during maximal exercise (Figure  
232 2B). Interestingly, we also report a negative relationship between fat oxidation and gut microbiota  $\alpha$ -  
233 diversity ( $p<0.05$ , Figure 2D), hosts with the lowest fecal bacterial density exhibiting the significant  
234 highest fat oxidation during submaximal exercise ( $p<0.05$ , Figure 2E).



235 To refine our analysis, we explored gut microbiota functionality at different levels according to the  
236 MetaCyc database. We observe that the ability of hosts to consume energy during maximal and  
237 submaximal exercises are inversely proportional to the richness of gut microbiota functionality  
238 ( $p < 0.05$ , Figure 2C and S3C, respectively). Specifically, several classes of metabolic pathways, including  
239 fermentation and carbohydrates degradation, show a negative association with the hosts' exercise  
240 capacity parameters, especially  $\dot{V}O_{2max}$  (Figure 2G). We then calculated the ratio between gut  
241 microbiota capacity to produce energy from available nutrients (i.e. abundance of pathways involved  
242 in the generation of precursor metabolites and energy), and its capacity to degrade substrates to serve  
243 as sources of nutrients to their own growth (i.e. Degradation/Utilization/Assimilation pathways  
244 abundance). Interestingly, this ratio is positively associated with the host's ability to consume energy  
245 during maximal exercise (i.e.  $\dot{V}O_{2max}$ ,  $r = 0.36$ ,  $p = 0.01$ , Figure 2H). Notably, the ratio of glycolysis and  
246 fermentation pathways (i.e. pyruvate producers and fermenters) on carbohydrate degradation  
247 pathways (i.e. degradation, storage and utilization of CHO essential for the bacterial growth) is also  
248 positively associated with maximal energy consumption during exercise ( $r = 0.34$ ,  $p = 0.02$ , Figure 2H).  
249 Together, these findings support that hosts with high exercise capacities exhibit a reduction in gut  
250 functionality richness, but this reduction seems to be associated with a remodeling of the gut bacterial  
251 ecosystem and its metabolic pathways, favoring bacterial energy production from available nutrients  
252 over the production of energy from complex molecules (e.g. starch and fibers).

### 253 **Fecal microbiota transplantation (FMT) from high to very high exercise capacity human donors elicits** 254 **distinct gut microbiota composition in transfected mice**

255 To evaluate whether the atypical gut bacterial ecosystem observed in humans with very high exercise  
256 capacity could directly affect host's energy metabolism and exercise capacity, we transfected gut  
257 microbiota from high to very high exercise capacity humans into ATB-pretreated mice (Figure 3A). We  
258 selected 8 physically active and non-sedentary donors exhibiting distinct exercise capacities (i.e. from  
259 high to very high  $\dot{V}O_{2max}$ , from low to very high FO) (Table S2). The fecal bacterial density, species  
260 engraftment rate, Bray-Curtis similarity between human donors and transfected mice post-FMT, as  
261 well as the donors gut microbiota relative abundance fractions reported post-FMT, are in accordance  
262 with current references to consider successful FMT engraftment in humans [38–40], thus supporting  
263 the effectiveness of FMT from human donors to transfected mice in our experiments (Figures S5A-E).  
264 The dissimilarity between mice reseeded with their own litter and transfected mice confirms such  
265 conclusions (Figures S5G-F). We next investigated the link between the parameters of donor exercise  
266 capacity with the gut microbiota compositions expressed in the transfected mice by using Canonical  
267 Analysis of PCo (CAP, Supplemental Material). We show that  $\dot{V}O_{2max}$ , FO and EEE are associated with

268 17% of the variability of the gut microbiota compositions of transfected mice ( $p < 0.01$ ). The second axis  
269 of the canonical analysis (CAP2) refers to the mice gut microbiota compositions explained by fat  
270 oxidation (FO) and exercise energy expenditure (EEE) of the human donors (Figure 3B). Here, we  
271 specifically identified *Akkermensia municipihila*, *Parabacteroides merdae* and *Bacteroides vulgatus*  
272 among the bacteria of transfected mice well-associated with exercise capacity parameters (Figure 3B).  
273 Together, these findings highlight that distinct gut microbiota compositions are transferred from  
274 humans to transfected mice depending on the exercise capacity parameters of the donors.

275 **The gut bacterial ecosystem from human donors affects insulin sensitivity and muscle glycogen**  
276 **stores in transfected mice, depending on the donor's exercise capacity.**

277 Five weeks post-FMT, we assessed the running exercise capacity, HOMA-IR score and skeletal muscle  
278 glycogen content to characterize the exercise capacity and insulin sensitivity of each transfected mice  
279 (Table S3). We first observe that HOMA-IR score is positively correlated with relative abdominal fat  
280 mass, and negatively with skeletal muscle glycogen content (Figure 3C and 3D), indicating a  
281 heterogeneous continuum of metabolic profiles in the transfected mice.

282 On the Figures 3E and 3F, each line symbolizes variables characterizing a transfected mouse. The mice's  
283 gut microbiota compositions are ordered depending on their positions in the second axis of the CAP  
284 (i.e. linked to the FO and the EEE of the donors). The Figure 3F represents the functional and metabolic  
285 variables (i.e. running exercise capacity, insulin sensitivity and body composition) associated to each  
286 gut microbiota composition. We next determined the 95%-CI of the  $r$  correlation between the second  
287 coordinate of the gut microbiota composition's CAP and the physiological variables of the transfected  
288 mice. Here, we show that muscle glycogen content is inversely correlated with the second coordinate  
289 of the mice gut microbiota composition's CAP ( $r = -0.49$ ,  $p < 0.05$ , Figure 3G), indicating that mice with  
290 gut microbiota compositions with negative coordinates in CAP2 exhibit a higher muscle glycogen level  
291 compared to those with positive coordinates. Since muscle glycogen content is directly associated with  
292 host insulin sensitivity [41], we logically observe that the HOMA-IR score is positively correlated with  
293 CAP2 ( $r = 0.41$ ,  $p < 0.05$ , Figure 3G), meaning that mice with gut microbiota compositions with negative  
294 coordinates in CAP2 exhibit better whole-body insulin sensitivity compared to those with positive  
295 coordinates. As previously described, *Akkermensia municipihila*, *Parabacteroides merdae* and  
296 *Bacteroides vulgatus* are the main bacteria characterizing the negative coordinate of the second axis  
297 of the CAP (Figure 3B). Our data are in line with previous studies where these bacteria were identified  
298 to exert metabolic benefits, especially reducing insulin resistance and fat mass gain in obese  
299 populations [42–44] and preventing atherosclerotic lesions in rodents [44,45]. In parallel to the results,  
300 we report positive correlations between HOMA-IR score and gut microbiota  $\alpha$ -diversity in transfected

301 mice ( $r = 0.41$ ,  $p=0.046$ , Figure 3H), whereas muscle glycogen content is negatively correlated with gut  
302 microbiota  $\alpha$ -diversity ( $r = -0.36$ ,  $p=0.08$ , Figure 3I). These results suggest that the metabolic benefits  
303 of gut microbiota transplantation from human donors with very high exercise capacity do not  
304 necessarily depend on the gut microbiota  $\alpha$ -diversity.

305 We finally explored the gut metabolic functionality of transfected mice and the relationship between  
306 functional pathways, exercise capacity, insulin sensitivity and muscle glycogen content. We report a  
307 positive correlation between pyruvate fermentation into acetate and lactate with running exercise  
308 capacity, while these pathways are negatively associated with HOMA-IR score ( $p<0.05$ , Figure 3J).  
309 Similarly, we observe a positive correlation between pathways of pyruvate synthesis (Glycolysis IV,  
310 Glycolysis from glucose) and muscle glycogen content ( $p<0.05$ , Figure 3J). Our results are consistent  
311 with previous studies reporting that high levels of the functional pathways involved in glycolysis (i.e.  
312 pyruvate synthesis) in the gut increase the availability of pyruvate [46], a key substrate for functional  
313 pathways of fermentation synthesizing SCFAs from pyruvate degradation [47,48]. In agreement with  
314 previous studies [49], all these findings highlight that transfection of gut microbiota associated with  
315 specific donor characteristics, here exercise capacity parameters, can significantly remodel gut  
316 microbiota composition and exert metabolic effects in transfected recipients.

## 317 **DISCUSSION**

318 During the last decade, substantial observational and interventional studies have been conducted to  
319 characterize the impact of physical activity on the gut microbiota ecosystem in humans, providing  
320 contradictory results concerning the effects on gut microbiota composition's  $\alpha$ -diversity in men and  
321 women [36,50–52]. The lack of consideration for the impact of diet when evaluating the effects of  
322 exercise capacities on gut microbiota composition is probably the main factor that can explain such  
323 discrepancies [28,36,51]. In our prospective clinical study, we rigorously recruited participants with  
324 low exercise capacity by matching their food intakes to match qualitatively those of participants with  
325 very high exercise capacity. Our data highlight that, for populations that do not present extreme  
326 exercise capacities (very low or very high), the effects of host's exercise capacity on the gut bacterial  
327 ecosystem appear to be very modest compared to those of food habits.

328 On the contrary, our results support that the gut bacterial ecosystem is remodeled in individuals with  
329 a very high ability to consume energy and preferentially use fat during submaximal exercise. In these  
330 athletes, we report a clear reduction of gut bacterial diversity (i.e.  $\alpha$ -diversity, bacterial density and  
331 richness of functionality) with a gut bacterial ecosystem dominated by *Prevotella copri*. This bacterial  
332 ecosystem is associated to high fecal propionate levels, in accordance with the role of this SCFA on

333 exercise capacity and fat oxidation [19,35]. We also report that the ratio between functional pathways  
334 characterizing the ability to produce energy from available nutrients, and its capacity to degrade  
335 substrates to serve as sources of nutrients is higher in humans with a very high ability to consume  
336 energy. Collectively, these findings suggest that the relationship between host energy metabolism and  
337 the gut bacterial ecosystem may be influenced by the availability of energy resources, which decreases  
338 when the host's physical activity levels and exercise capacity are high. In this context, the gut bacterial  
339 ecosystem seems to specialize to cope with this situation, with some collateral implications, including  
340 a reduction in bacterial diversity and density.

341 The FMT have been recognized as a therapeutic tool to treat non-communicable diseases including  
342 obesity, diabetes, neuropsychiatric disorders or inflammatory bowel diseases [53]. One of the current  
343 issues is to determine which clinical or metabolic characteristics the donor must possess to observe  
344 clinical and/or metabolic effects in the recipient. Numerous studies have already assessed the impact  
345 of FMT from donors with distinct metabolic profiles (i.e. mice, brown bears or humans), reporting  
346 benefits on transfected mice concerning glucose tolerance, insulin sensitivity or lipid metabolism  
347 [49,54,55]. While exercise capacity is a clinical hallmark of health status [1,2], it is not yet considered  
348 a donor's clinical parameter that could induce metabolic benefits in recipients. However, few recent  
349 studies have highlighted that FMT from exercise-trained donor mice improves the metabolic profile of  
350 the transfected mice compared to those from sedentary donor mice [56,57]. In the present study, we  
351 intend for the first time to evaluate the consequences of FMT from human donors with high to very  
352 high exercise capacity on both metabolic parameters and exercise capacity in recipient mice. When we  
353 transfected ATB-pretreated mice with fecal samples from our human cohort, we observe in the  
354 transfected mice that donors with very high exercise capacity promote an overexpression of  
355 *Akkermensia muciniphila*, *Parabacteroides merdae* and *Bacteroides vulgatus*, recognized to induce  
356 metabolic benefits for the host [42,43,45]. Interestingly, these bacterial ecosystems are associated  
357 with improvements in whole-body insulin sensitivity and in muscle glycogen stores, supporting  
358 metabolic benefits associated to the transfer of gut bacterial ecosystem from donors with very high  
359 exercise capacity. Finally, mice exhibiting greater insulin sensitivity and higher muscle glycogen stores  
360 display a reduction of  $\alpha$ -diversity and a higher expression of SCFA producing-pathways, further  
361 supporting the hypothesis of a specialization of the gut bacterial ecosystem in favor of metabolite  
362 generation, but detrimental for bacterial growth and diversity.

363 In a therapeutic perspective, we selected human donors with high to very high  $\dot{V}O_{2max}$  and normo-  
364 weight, constituting typical lean, healthy, very physically active donors. Despite gut microbiota  
365 remodeling and metabolic adaptations, the running exercise capacity of transfected mice remained

366 unaffected. Importantly, these mice did not perform regular physical exercise during the 5 weeks of the  
367 FMT protocol, and the gut bacterial ecosystem they received from human donors was consequently  
368 not subjected to the high energy demands related to physical exercise. These results suggest that gut  
369 microbiota remodeling from donors with high exercise capacity alone is not sufficient to improve the  
370 exercise capacity of recipients. Overall, all these findings open promising research perspectives: 1) to  
371 improve the management of the gut microbiota ecosystem of elite athletes and patients performing  
372 adapted physical activity for therapeutic purposes, and 2) to personalize FMT in patients treated for  
373 non-communicable diseases by including exercise capacity in the clinical criteria for donor selection.

#### 374 **DATA AND CODE AVAILABILITY**

375 Raw metagenomics sequencing data have been deposited into the NCBI under the accession number  
376 PRJNA1115089. In addition, the scripts and others data (metabolomics, food intakes and physiological  
377 data) used for the computational analyses described in this study are available at GitHub  
378 <https://github.com/DJrMartin/Gut-Microbiota-and-Physical-Activity.git>. Any additional information  
379 required to reanalyze the data reported in this paper is available from the lead contact upon request.

#### 380 **ACKNOWLEDGEMENTS**

381 We thank all the participants and coaches from Stade Rennais FC and Sojasun Espoir for their  
382 committed efforts in participating in the present study. F.D. acknowledges fundings from the Brittany  
383 Council (N°21004090), the Société Française de Nutrition (SFN) and Nahibu. V.B. and F.D. acknowledge  
384 fundings from the University of Rennes. D.M, F.D and V.B acknowledge fundings from French National  
385 Research Agency within the framework of the PIA France 2030 programme for EUR DIGISPORT (ANR-  
386 18-EURE-0022) and CONTINUUM (ANR-21-ESRE-0030) projects.

#### 387 **AUTHORS CONTRIBUTION**

388 Conceptualization and methodology, D.M., M.B., A.C., V.B. and F.D.; data curation, D.M., M.B., M.H.,  
389 L.O., R.D., M.H., E.L., R.B., A.G., P.G., M.C., F.D.; formal analysis and investigation, D.M., M.B., M.H.,  
390 A.C., V.B. and F.D.; interpretation of data, D.M., M.B., V.B. and F.D.; writing – original draft, D.M.; writ-  
391 ing – review & editing, V.B. and F.D.; funding acquisition, P.C., C.C., V.B. and F.D.; project administra-  
392 tion, V.B. and F.D.; supervision, V.B. and F.D. All authors approved the final version of the manuscript.

#### 393 **DECLARATION OF INTERESTS**

394 M.H., P.C. and C.C. are employees and skateholders of Nahibu.

## 395 FIGURE TITLES AND LEGENDS

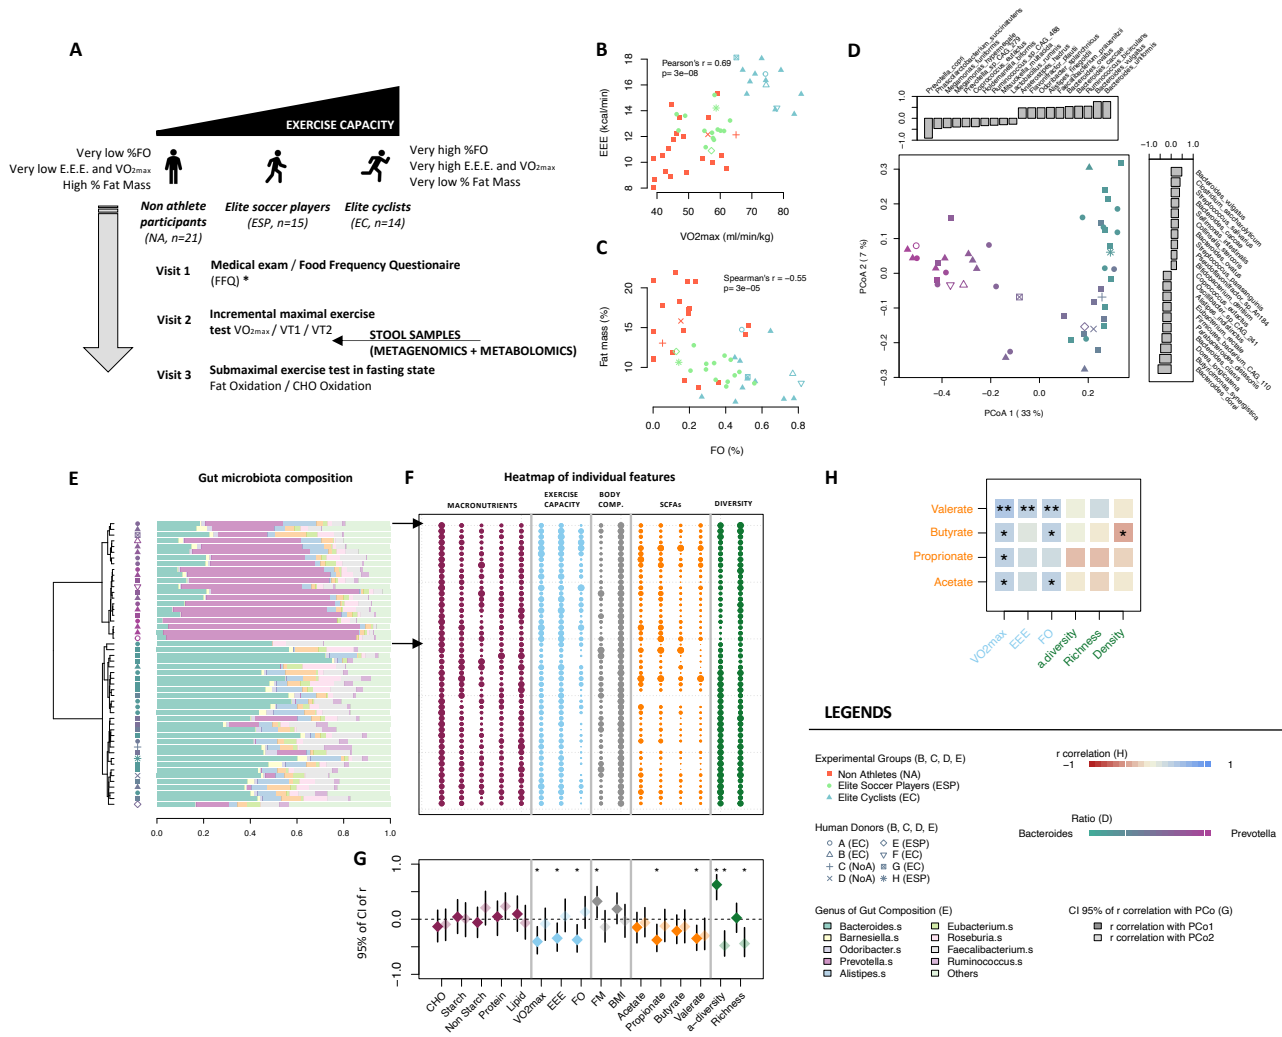

396 **Figure 1. Exercise capacity is associated with gut microbiota communities, independently of food**  
 397 **and nutrient intakes.** (A) Experimental design (\*non-athlete participants were selected to have their  
 398 dietary food intake match that of elite athletes). (B) E.E.E (kcal/min) with respect to  $\dot{V}O_{2max}$   
 399 (ml/min/kg). (C) Fat mass with respect to Fat Oxidation (% of the total energy substrate oxidation). (D)  
 400 Principal Coordinates Analysis (PCoA) from Bray Curtis dissimilarity of humans' gut microbiota  
 401 compositions. Subjects are colored by their ratio of *Bacteroides/Prevotella* within their metagenome.  
 402 The bar plots represent the strongest Spearman's  $r$  correlations (in absolute value) between species  
 403 and PCoA coordinates. (E) Hierarchical Ascendant Clustering computed from the Bray Curtis pairwise  
 404 dissimilarity matrix (left panel) with the gut microbiota composition of the participants (1 line = 1  
 405 participant; right panel) (F) Heatmap of relative macronutrient intakes, exercise capacity parameters,  
 406 body composition, fecal SCFA content and gut microbiota composition's diversities (1 line = 1  
 407 participant). The points' width depends on the intensity of the variable (i.e. normalization by the intra-  
 408 variable maximum is applied). (G) 95% confidence interval of the  $r$  correlation between each variable

409 with PCo1 (in dark colors) and PCo2 (in light colors) (see panel **D**). **(H)** r correlation between exercise  
410 energy parameters, gut microbiota diversity and bacterial density with fecal SCFA content. Statistical  
411 significance of the correlation: \*  $p < 0.05$ ; \*\*  $p < 0.01$ ; \*\*\*  $p < 0.001$ .

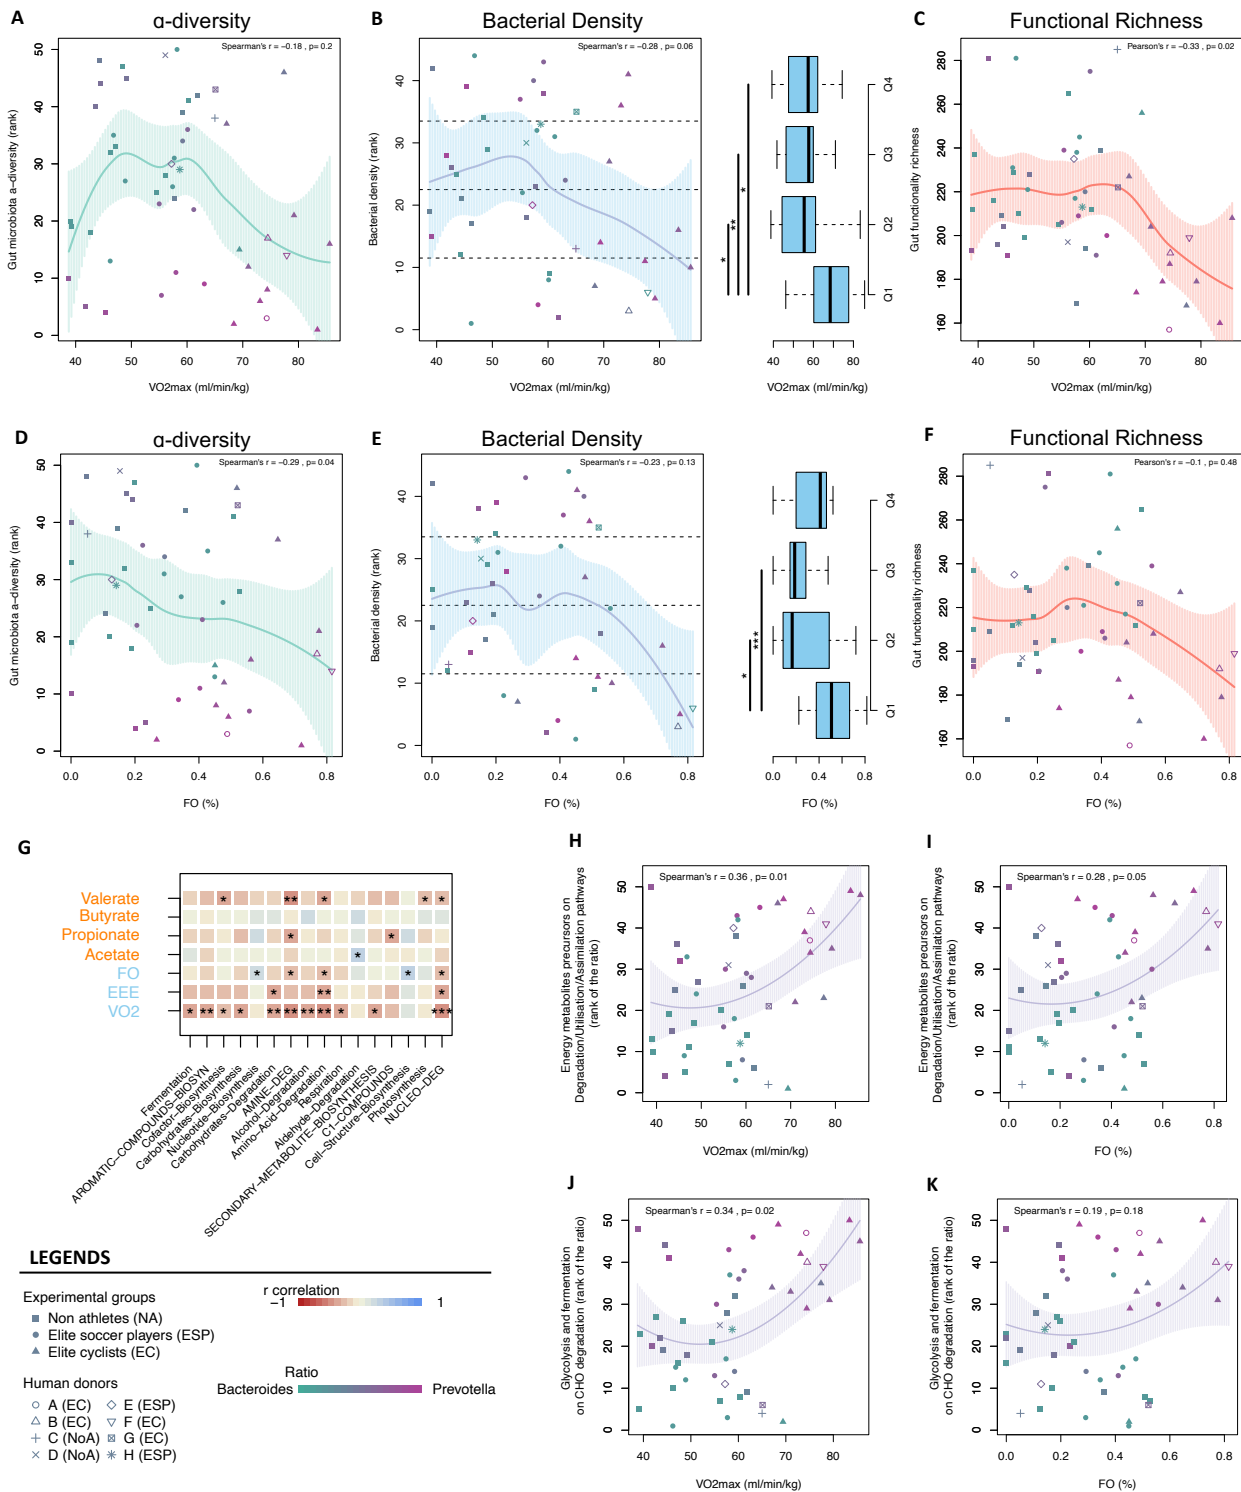

412 **Figure 2. Metagenomic and metabolomic data support a selective pressure between gut microbiota**  
 413 **and host energy metabolism.** Local regression between  $\dot{V}O_{2max}$  and gut microbiota  $\alpha$ -diversity (A),  
 414 bacterial density (B) and gut microbiota functionality abundance (C). Local regression between fat  
 415 oxidation (FO %) and gut microbiota  $\alpha$ -diversity (D), bacterial density (E) and gut microbiota  
 416 functionality abundance (F). The local green, blue and red regressions correspond respectively to the



417  $\alpha$ -diversity, bacterial density and functional abundance of the bacterial ecosystem within the EXOMIC  
418 cohort. The boxplots represent the repartition of  $VO_{2max}$  (**B**) and FO (%) (**E**) within each quantile of  
419 bacterial density. Quantiles are materialized by dashed lines on the local regression plots. (**G**)  
420 Correlation between gut microbiota functional families and fecal SFCAs, and exercise capacity  
421 parameters. Local regression between the ratio of Precursors of Energy metabolites on  
422 Degradation/Utilization/Assimilation pathways (gut microbiota functional superfamily) and  $\dot{V}O_{2max}$  (**H**)  
423 or FO (**I**). Local regression between the ratio Glycolysis and Fermentation on CHO degradation  
424 pathways (gut microbiota functional superfamily) and  $\dot{V}O_{2max}$  (**J**) or FO (**K**). For local regressions, the  
425 dark line represents the center of the local regression with the 95%-CI in dashed line.

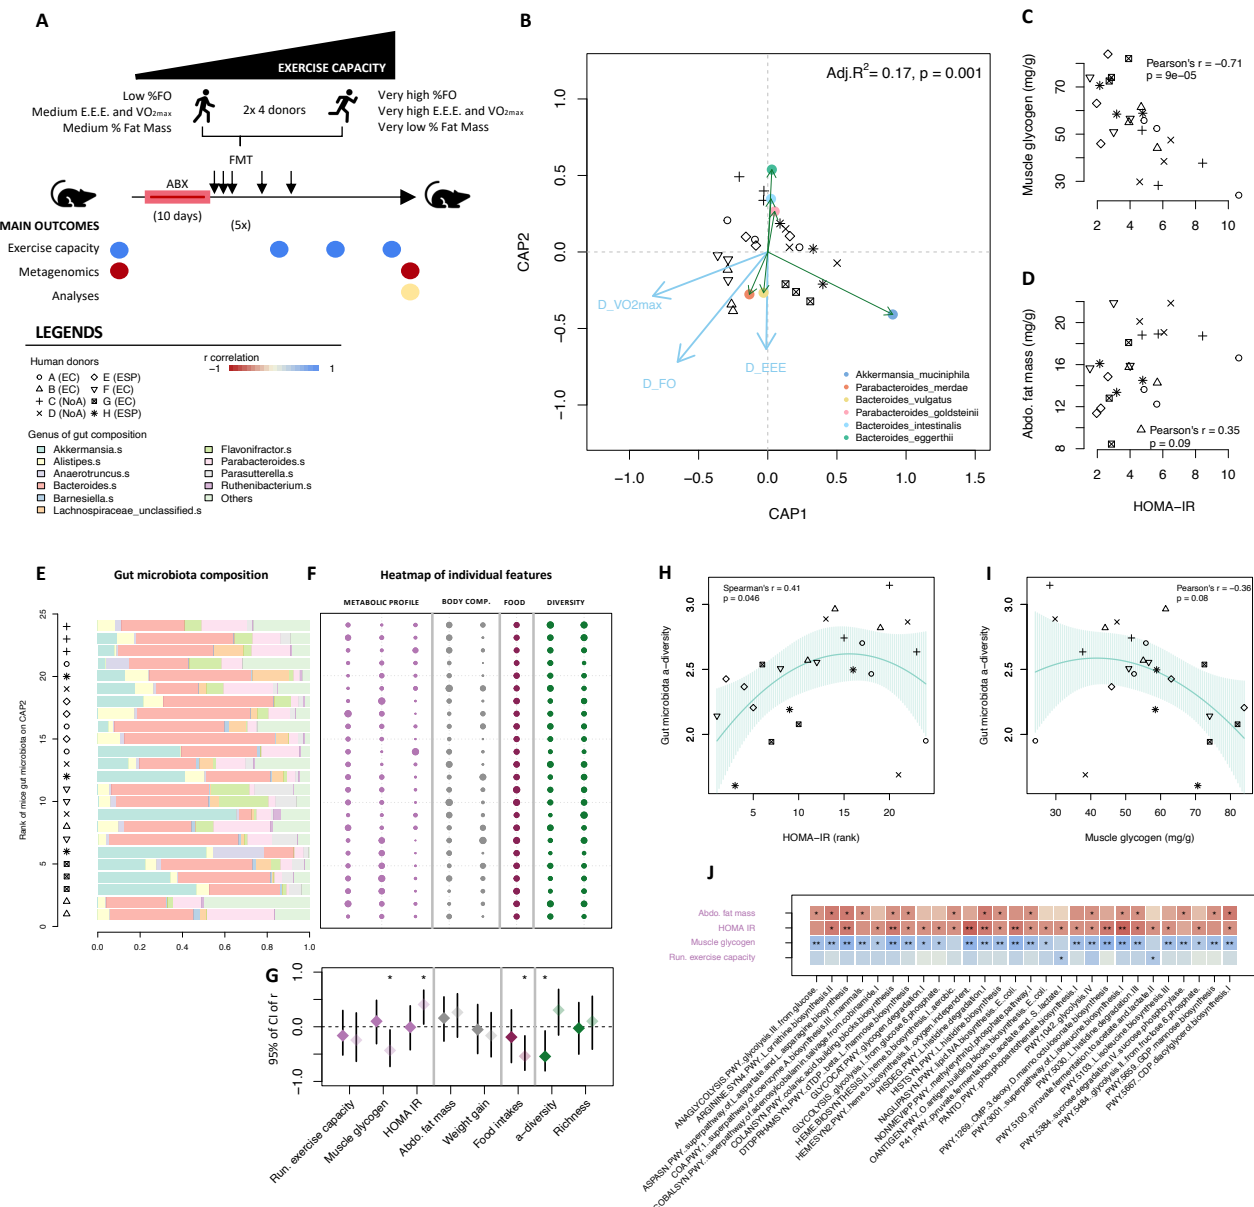

426 **Figure 3. The gut bacterial ecosystem from human donors affects insulin sensitivity and muscle**  
 427 **glycogen stores in transfected mice, depending on the donor's exercise capacity. (A)** Experimental  
 428 design of FMT from human donors with heterogeneous exercise capacity into antibiotic-pretreated  
 429 mice. **(B)** Canonical Analysis of Principal Coordinates (CAP) between the Principal Coordinates of the  
 430 pairwise dissimilarity matrix (Bray Curtis) of mice's gut microbiota compositions and the donors'  
 431 exercise capacity parameters (blue arrows). The points represent the most associated species of the  
 432 second axis of the CAP. **(C)** Muscle glycogen content according to HOMA-IR. **(D)** Abdominal fat mass  
 433 according to HOMA-IR. **(E)** Ranked mice from the CAP2 with the corresponding gut microbiota  
 434 composition (1 line = 1 mice). **(F)** Heatmap of metabolic profile, body composition, food intake and gut  
 435 microbiota composition's diversities (1 line = 1 mice), the width of each point is normalized by the  
 436 intra-variable maximum. **(G)** 95% confidence interval of the r correlation between each variable either

437 with CAP1 (in dark colors) or with CAP2 (in light colors) determined in panel **B**. Local regression  
438 between gut microbiota  $\alpha$ -diversity and HOMA-IR score (**H**) or muscle glycogen content in mice. (**J**)  
439 Correlations between gut microbiota functional families and metabolic parameters, exercise capacity  
440 and body composition in mice. Statistical significance of the correlation: \*  $p < 0.05$ ; \*\*  $p < 0.01$ ; \*\*\*  
441  $p < 0.001$ .

## 442 REFERENCES

- 443 1 Myers J, Prakash M, Froelicher V, *et al.* Exercise Capacity and Mortality among Men  
444 Referred for Exercise Testing. *N Engl J Med.* 2002;346:793–801. doi:  
445 10.1056/NEJMoa011858
- 446 2 Mandsager K, Harb S, Cremer P, *et al.* Association of Cardiorespiratory Fitness With Long-  
447 term Mortality Among Adults Undergoing Exercise Treadmill Testing. *JAMA Netw Open.*  
448 2018;1:e183605. doi: 10.1001/jamanetworkopen.2018.3605
- 449 3 Goldstein RE. Exercise Capacity. In: Walker HK, Hall WD, Hurst JW, eds. *Clinical Methods:*  
450 *The History, Physical, and Laboratory Examinations.* Boston: Butterworths 1990.
- 451 4 Amaro-Gahete FJ, Sanchez-Delgado G, Jurado-Fasoli L, *et al.* Assessment of maximal fat  
452 oxidation during exercise: A systematic review. *Scand J Med Sci Sports.* 2019;29:910–21.  
453 doi: 10.1111/sms.13424
- 454 5 Clausen JSR, Marott JL, Holtermann A, *et al.* Midlife Cardiorespiratory Fitness and the  
455 Long-Term Risk of Mortality: 46 Years of Follow-Up. *J Am Coll Cardiol.* 2018;72:987–95.  
456 doi: 10.1016/j.jacc.2018.06.045
- 457 6 van Loon LJ, Greenhaff PL, Constantin-Teodosiu D, *et al.* The effects of increasing exercise  
458 intensity on muscle fuel utilisation in humans. *J Physiol.* 2001;536:295–304. doi:  
459 10.1111/j.1469-7793.2001.00295.x
- 460 7 Ørtenblad N, Westerblad H, Nielsen J. Muscle glycogen stores and fatigue. *J Physiol.*  
461 2013;591:4405–13. doi: 10.1113/jphysiol.2013.251629
- 462 8 Hargreaves M, Spriet LL. Skeletal muscle energy metabolism during exercise. *Nat Metab.*  
463 2020;2:817–28. doi: 10.1038/s42255-020-0251-4
- 464 9 Liu J, Tan Y, Cheng H, *et al.* Functions of Gut Microbiota Metabolites, Current Status and  
465 Future Perspectives. *Aging Dis.* 2022;13:1106–26. doi: 10.14336/AD.2022.0104
- 466 10 Takeuchi T, Kubota T, Nakanishi Y, *et al.* Gut microbial carbohydrate metabolism  
467 contributes to insulin resistance. *Nature.* 2023;621:389–95. doi: 10.1038/s41586-023-  
468 06466-x
- 469 11 Zarrinpar A, Chaix A, Xu ZZ, *et al.* Antibiotic-induced microbiome depletion alters  
470 metabolic homeostasis by affecting gut signaling and colonic metabolism. *Nat Commun.*  
471 2018;9:2872. doi: 10.1038/s41467-018-05336-9
- 472 12 Dohnalová L, Lundgren P, Carty JRE, *et al.* A microbiome-dependent gut–brain pathway  
473 regulates motivation for exercise. *Nature.* 2022;612:739–47. doi: 10.1038/s41586-022-  
474 05525-z
- 475 13 Nay K, Jollet M, Goustard B, *et al.* Gut bacteria are critical for optimal muscle function: a  
476 potential link with glucose homeostasis. *Am J Physiol Endocrinol Metab.* 2019;317:E158–  
477 71. doi: 10.1152/ajpendo.00521.2018

- 478 14 Okamoto T, Morino K, Ugi S, *et al.* Microbiome potentiates endurance exercise through  
479 intestinal acetate production. *Am J Physiol Endocrinol Metab.* 2019;316:E956–66. doi:  
480 10.1152/ajpendo.00510.2018
- 481 15 Kim HJ, Kim YJ, Kim YJ, *et al.* Microbiota influences host exercise capacity via modulation  
482 of skeletal muscle glucose metabolism in mice. *Exp Mol Med.* 2023;55:1820–30. doi:  
483 10.1038/s12276-023-01063-4
- 484 16 Hawley JA. Microbiota and muscle highway - two way traffic. *Nat Rev Endocrinol.*  
485 2020;16:71–2. doi: 10.1038/s41574-019-0291-6
- 486 17 den Besten G, van Eunen K, Groen AK, *et al.* The role of short-chain fatty acids in the  
487 interplay between diet, gut microbiota, and host energy metabolism. *J Lipid Res.*  
488 2013;54:2325–40. doi: 10.1194/jlr.R036012
- 489 18 Petersen LM, Bautista EJ, Nguyen H, *et al.* Community characteristics of the gut  
490 microbiomes of competitive cyclists. *Microbiome.* 2017;5:98. doi: 10.1186/s40168-017-  
491 0320-4
- 492 19 Scheiman J, Luber JM, Chavkin TA, *et al.* Meta-omics analysis of elite athletes identifies a  
493 performance-enhancing microbe that functions via lactate metabolism. *Nat Med.*  
494 2019;25:1104–9. doi: 10.1038/s41591-019-0485-4
- 495 20 Allen JM, Mailing LJ, Niemi GM, *et al.* Exercise Alters Gut Microbiota Composition and  
496 Function in Lean and Obese Humans. *Med Sci Sports Exerc.* 2018;50:747–57. doi:  
497 10.1249/MSS.0000000000001495
- 498 21 Barton W, Penney NC, Cronin O, *et al.* The microbiome of professional athletes differs  
499 from that of more sedentary subjects in composition and particularly at the functional  
500 metabolic level. *Gut.* 2018;67:625–33. doi: 10.1136/gutjnl-2016-313627
- 501 22 Greenhalgh K, Meyer KM, Aagaard KM, *et al.* The human gut microbiome in health:  
502 establishment and resilience of microbiota over a lifetime. *Environ Microbiol.*  
503 2016;18:2103–16. doi: 10.1111/1462-2920.13318
- 504 23 Mulligan AA, Luben RN, Bhaniani A, *et al.* A new tool for converting food frequency  
505 questionnaire data into nutrient and food group values: FETA research methods and  
506 availability. *BMJ Open.* 2014;4:e004503. doi: 10.1136/bmjopen-2013-004503
- 507 24 Bull FC, Maslin TS, Armstrong T. Global physical activity questionnaire (GPAQ): nine  
508 country reliability and validity study. *J Phys Act Health.* 2009;6:790–804. doi:  
509 10.1123/jpah.6.6.790
- 510 25 Adamo KB, Graham TE. Comparison of traditional measurements with macroglycogen  
511 and proglycogen analysis of muscle glycogen. *J Appl Physiol Bethesda Md 1985.*  
512 1998;84:908–13. doi: 10.1152/jappl.1998.84.3.908

- 513 26 Beghini F, Mclver LJ, Blanco-Míguez A, *et al.* Integrating taxonomic, functional, and strain-  
514 level profiling of diverse microbial communities with bioBakery 3. *eLife*. 2021;10:e65088.  
515 doi: 10.7554/eLife.65088
- 516 27 Clarke SF, Murphy EF, O’Sullivan O, *et al.* Exercise and associated dietary extremes impact  
517 on gut microbial diversity. *Gut*. 2014;63:1913–20. doi: 10.1136/gutjnl-2013-306541
- 518 28 Baldanzi G, Sayols-Baixeras S, Ekblom-Bak E, *et al.* Accelerometer-based physical activity  
519 is associated with the gut microbiota in 8416 individuals in SCAPIS. *eBioMedicine*.  
520 2024;100. doi: 10.1016/j.ebiom.2024.104989
- 521 29 Arumugam M, Raes J, Pelletier E, *et al.* Enterotypes of the human gut microbiome.  
522 *Nature*. 2011;473:174–80. doi: 10.1038/nature09944
- 523 30 Blanco-Míguez A, Gálvez EJC, Pasolli E, *et al.* Extension of the Segatella copri complex to  
524 13 species with distinct large extrachromosomal elements and associations with host  
525 conditions. *Cell Host Microbe*. 2023;31:1804-1819.e9. doi: 10.1016/j.chom.2023.09.013
- 526 31 Christensen L, Vuholm S, Roager HM, *et al.* *Prevotella* Abundance Predicts Weight Loss  
527 Success in Healthy, Overweight Adults Consuming a Whole-Grain Diet Ad Libitum: A Post  
528 Hoc Analysis of a 6-Wk Randomized Controlled Trial. *J Nutr*. 2019;149:2174–81. doi:  
529 10.1093/jn/nxz198
- 530 32 den Besten G, van Eunen K, Groen AK, *et al.* The role of short-chain fatty acids in the  
531 interplay between diet, gut microbiota, and host energy metabolism. *J Lipid Res*.  
532 2013;54:2325–40. doi: 10.1194/jlr.R036012
- 533 33 Watanabe Y, Nagai F, Morotomi M. Characterization of *Phascolarctobacterium*  
534 *succinatutens* sp. nov., an asaccharolytic, succinate-utilizing bacterium isolated from  
535 human feces. *Appl Environ Microbiol*. 2012;78:511–8. doi: 10.1128/AEM.06035-11
- 536 34 De Vadder F, Kovatcheva-Datchary P, Zitoun C, *et al.* Microbiota-Produced Succinate  
537 Improves Glucose Homeostasis via Intestinal Gluconeogenesis. *Cell Metab*. 2016;24:151–  
538 7. doi: 10.1016/j.cmet.2016.06.013
- 539 35 Chambers ES, Byrne CS, Aspey K, *et al.* Acute oral sodium propionate supplementation  
540 raises resting energy expenditure and lipid oxidation in fasted humans. *Diabetes Obes*  
541 *Metab*. 2018;20:1034–9. doi: 10.1111/dom.13159
- 542 36 Estaki M, Pither J, Baumeister P, *et al.* Cardiorespiratory fitness as a predictor of intestinal  
543 microbial diversity and distinct metagenomic functions. *Microbiome*. 2016;4:42. doi:  
544 10.1186/s40168-016-0189-7
- 545 37 Dupuit M, Rance M, Morel C, *et al.* Effect of concurrent training on body composition and  
546 gut microbiota in postmenopausal women with overweight or obesity. *Med Sci Sports*  
547 *Exerc*. 2022;54:517–29.

- 548 38 Ianiro G, Punčochář M, Karcher N, *et al.* Variability of strain engraftment and  
549 predictability of microbiome composition after fecal microbiota transplantation across  
550 different diseases. *Nat Med.* 2022;28:1913–23. doi: 10.1038/s41591-022-01964-3
- 551 39 Podlesny D, Durdevic M, Paramsothy S, *et al.* Identification of clinical and ecological  
552 determinants of strain engraftment after fecal microbiota transplantation using  
553 metagenomics. *Cell Rep Med.* 2022;3:100711. doi: 10.1016/j.xcrm.2022.100711
- 554 40 Porcari S, Benech N, Valles-Colomer M, *et al.* Key determinants of success in fecal  
555 microbiota transplantation: From microbiome to clinic. *Cell Host Microbe.* 2023;31:712–  
556 33. doi: 10.1016/j.chom.2023.03.020
- 557 41 Petersen MC, Shulman GI. Mechanisms of Insulin Action and Insulin Resistance. *Physiol*  
558 *Rev.* 2018;98:2133–223. doi: 10.1152/physrev.00063.2017
- 559 42 Dao MC, Everard A, Aron-Wisnewsky J, *et al.* Akkermansia muciniphila and improved  
560 metabolic health during a dietary intervention in obesity: relationship with gut  
561 microbiome richness and ecology. *Gut.* 2016;65:426–36. doi: 10.1136/gutjnl-2014-  
562 308778
- 563 43 Everard A, Belzer C, Geurts L, *et al.* Cross-talk between Akkermansia muciniphila and  
564 intestinal epithelium controls diet-induced obesity. *Proc Natl Acad Sci.* 2013;110:9066–  
565 71. doi: 10.1073/pnas.1219451110
- 566 44 Xu M, Lan R, Qiao L, *et al.* Bacteroides vulgatus Ameliorates Lipid Metabolic Disorders  
567 and Modulates Gut Microbial Composition in Hyperlipidemic Rats. *Microbiol Spectr.*  
568 2023;11:e0251722. doi: 10.1128/spectrum.02517-22
- 569 45 Qiao S, Liu C, Sun L, *et al.* Gut Parabacteroides merdae protects against cardiovascular  
570 damage by enhancing branched-chain amino acid catabolism. *Nat Metab.* 2022;4:1271–  
571 86. doi: 10.1038/s42255-022-00649-y
- 572 46 Macfarlane S, Macfarlane GT. Regulation of short-chain fatty acid production. *Proc Nutr*  
573 *Soc.* 2003;62:67–72. doi: 10.1079/PNS2002207
- 574 47 Liu Y, Wang Y, Ni Y, *et al.* Gut Microbiome Fermentation Determines the Efficacy of  
575 Exercise for Diabetes Prevention. *Cell Metab.* 2020;31:77-91.e5. doi:  
576 10.1016/j.cmet.2019.11.001
- 577 48 Louis P, Flint HJ. Formation of propionate and butyrate by the human colonic microbiota.  
578 *Environ Microbiol.* 2017;19:29–41. doi: 10.1111/1462-2920.13589
- 579 49 de Groot P, Scheithauer T, Bakker GJ, *et al.* Donor metabolic characteristics drive effects  
580 of faecal microbiota transplantation on recipient insulin sensitivity, energy expenditure  
581 and intestinal transit time. *Gut.* 2020;69:502–12. doi: 10.1136/gutjnl-2019-318320
- 582 50 Barton W, Penney NC, Cronin O, *et al.* The microbiome of professional athletes differs  
583 from that of more sedentary subjects in composition and particularly at the functional  
584 metabolic level. *Gut.* 2018;67:625–33. doi: 10.1136/gutjnl-2016-313627

- 585 51 Clarke SF, Murphy EF, O’Sullivan O, *et al.* Exercise and associated dietary extremes impact  
586 on gut microbial diversity. *Gut*. 2014;63:1913–20. doi: 10.1136/gutjnl-2013-306541
- 587 52 Shah S, Mu C, Moossavi S, *et al.* Physical activity-induced alterations of the gut  
588 microbiota are BMI dependent. *FASEB J Off Publ Fed Am Soc Exp Biol*. 2023;37:e22882.  
589 doi: 10.1096/fj.202201571R
- 590 53 Hanssen NMJ, de Vos WM, Nieuwdorp M. Fecal microbiota transplantation in human  
591 metabolic diseases: From a murky past to a bright future? *Cell Metab*. 2021;33:1098–  
592 110. doi: 10.1016/j.cmet.2021.05.005
- 593 54 Kootte RS, Levin E, Salojärvi J, *et al.* Improvement of Insulin Sensitivity after Lean Donor  
594 Feces in Metabolic Syndrome Is Driven by Baseline Intestinal Microbiota Composition.  
595 *Cell Metab*. 2017;26:611-619.e6. doi: 10.1016/j.cmet.2017.09.008
- 596 55 Sommer F, Ståhlman M, Ilkayeva O, *et al.* The Gut Microbiota Modulates Energy  
597 Metabolism in the Hibernating Brown Bear *Ursus arctos*. *Cell Rep*. 2016;14:1655–61. doi:  
598 10.1016/j.celrep.2016.01.026
- 599 56 Aoi W, Inoue R, Mizushima K, *et al.* Exercise-acclimated microbiota improves skeletal  
600 muscle metabolism via circulating bile acid deconjugation. *iScience*. 2023;26:106251. doi:  
601 10.1016/j.isci.2023.106251
- 602 57 Lai Z-L, Tseng C-H, Ho HJ, *et al.* Fecal microbiota transplantation confers beneficial  
603 metabolic effects of diet and exercise on diet-induced obese mice. *Sci Rep*. 2018;8:15625.  
604 doi: 10.1038/s41598-018-33893-y
- 605
